# Supplementary material for: Mutation spectrum, expression profiling, and prognosis evaluation of Fanconi anemia signaling pathway genes for 4259 patients with myelodysplastic syndromes or acute myeloid leukemia
Source: PubMed Central journal article supplement (PMC10652513; doi:10.1186/s12920-023-01730-5), 2023-11-16
Supplement: 12920_2023_1730_MOESM1_ESM.pdf [file 12920_2023_1730_MOESM1_ESM.pdf]

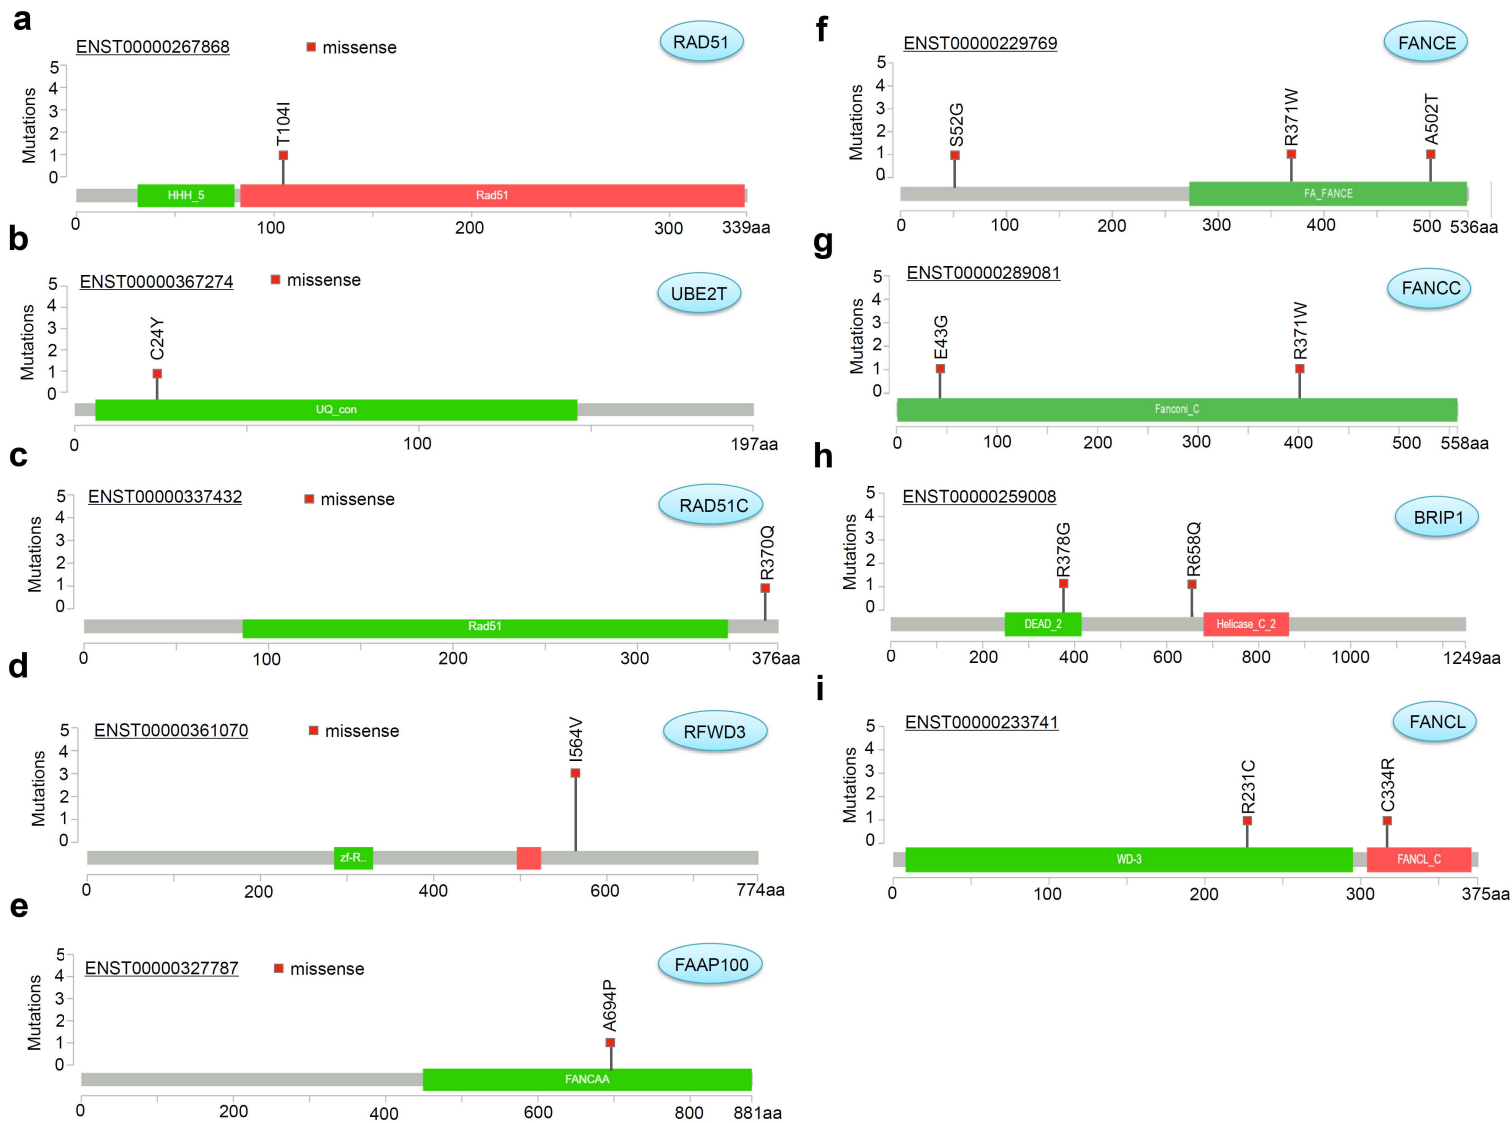

**Figure S1**

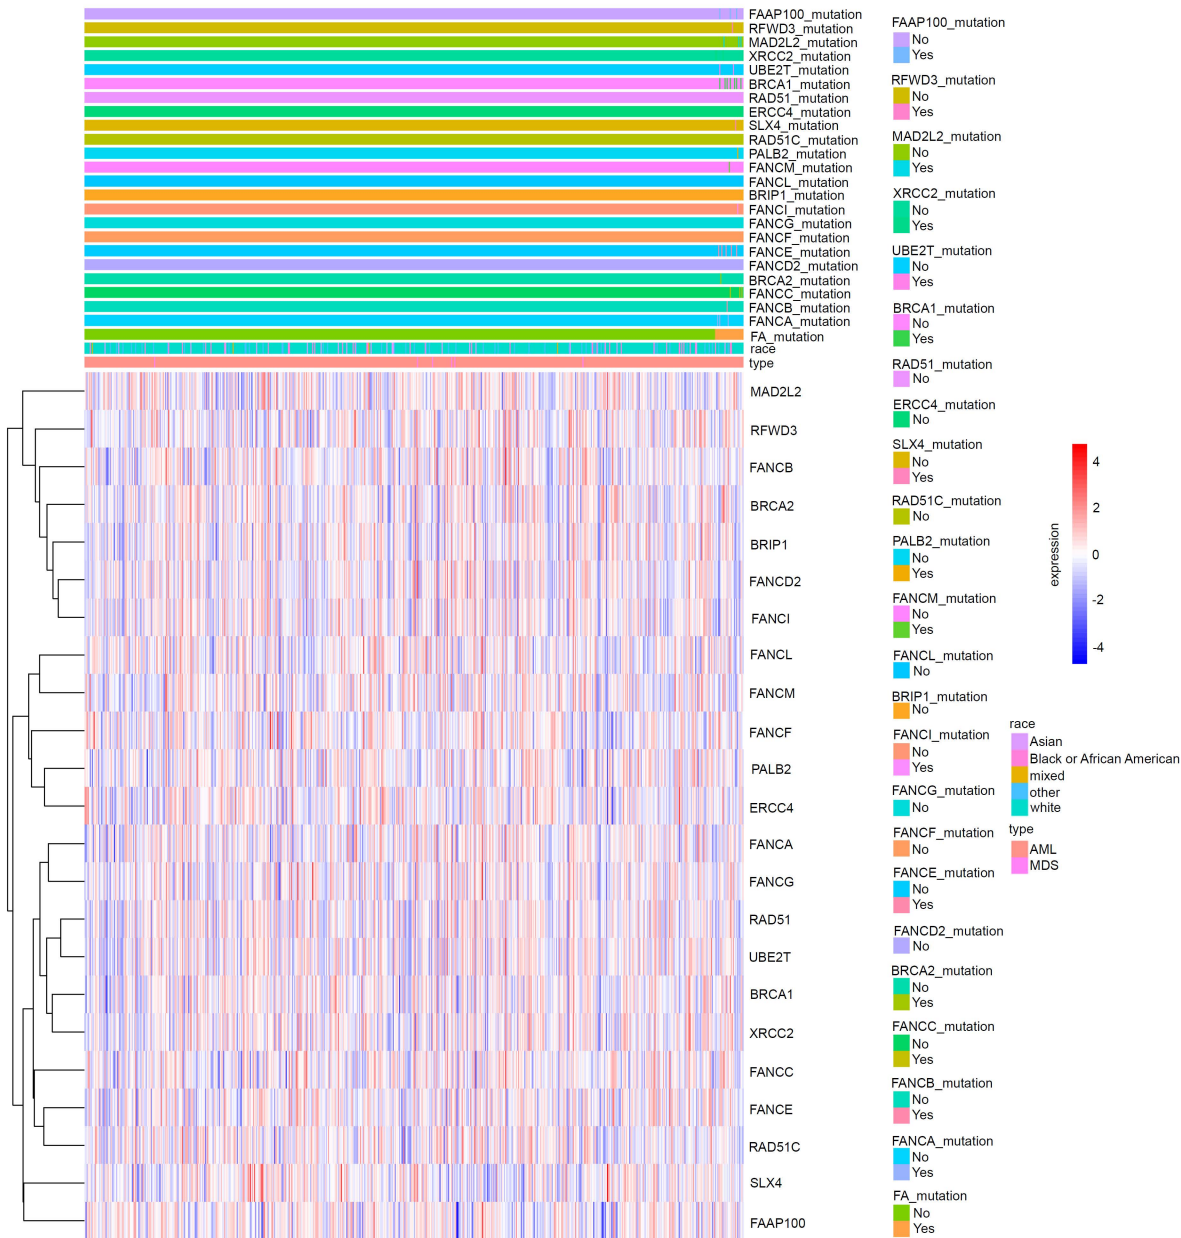

Figure S2

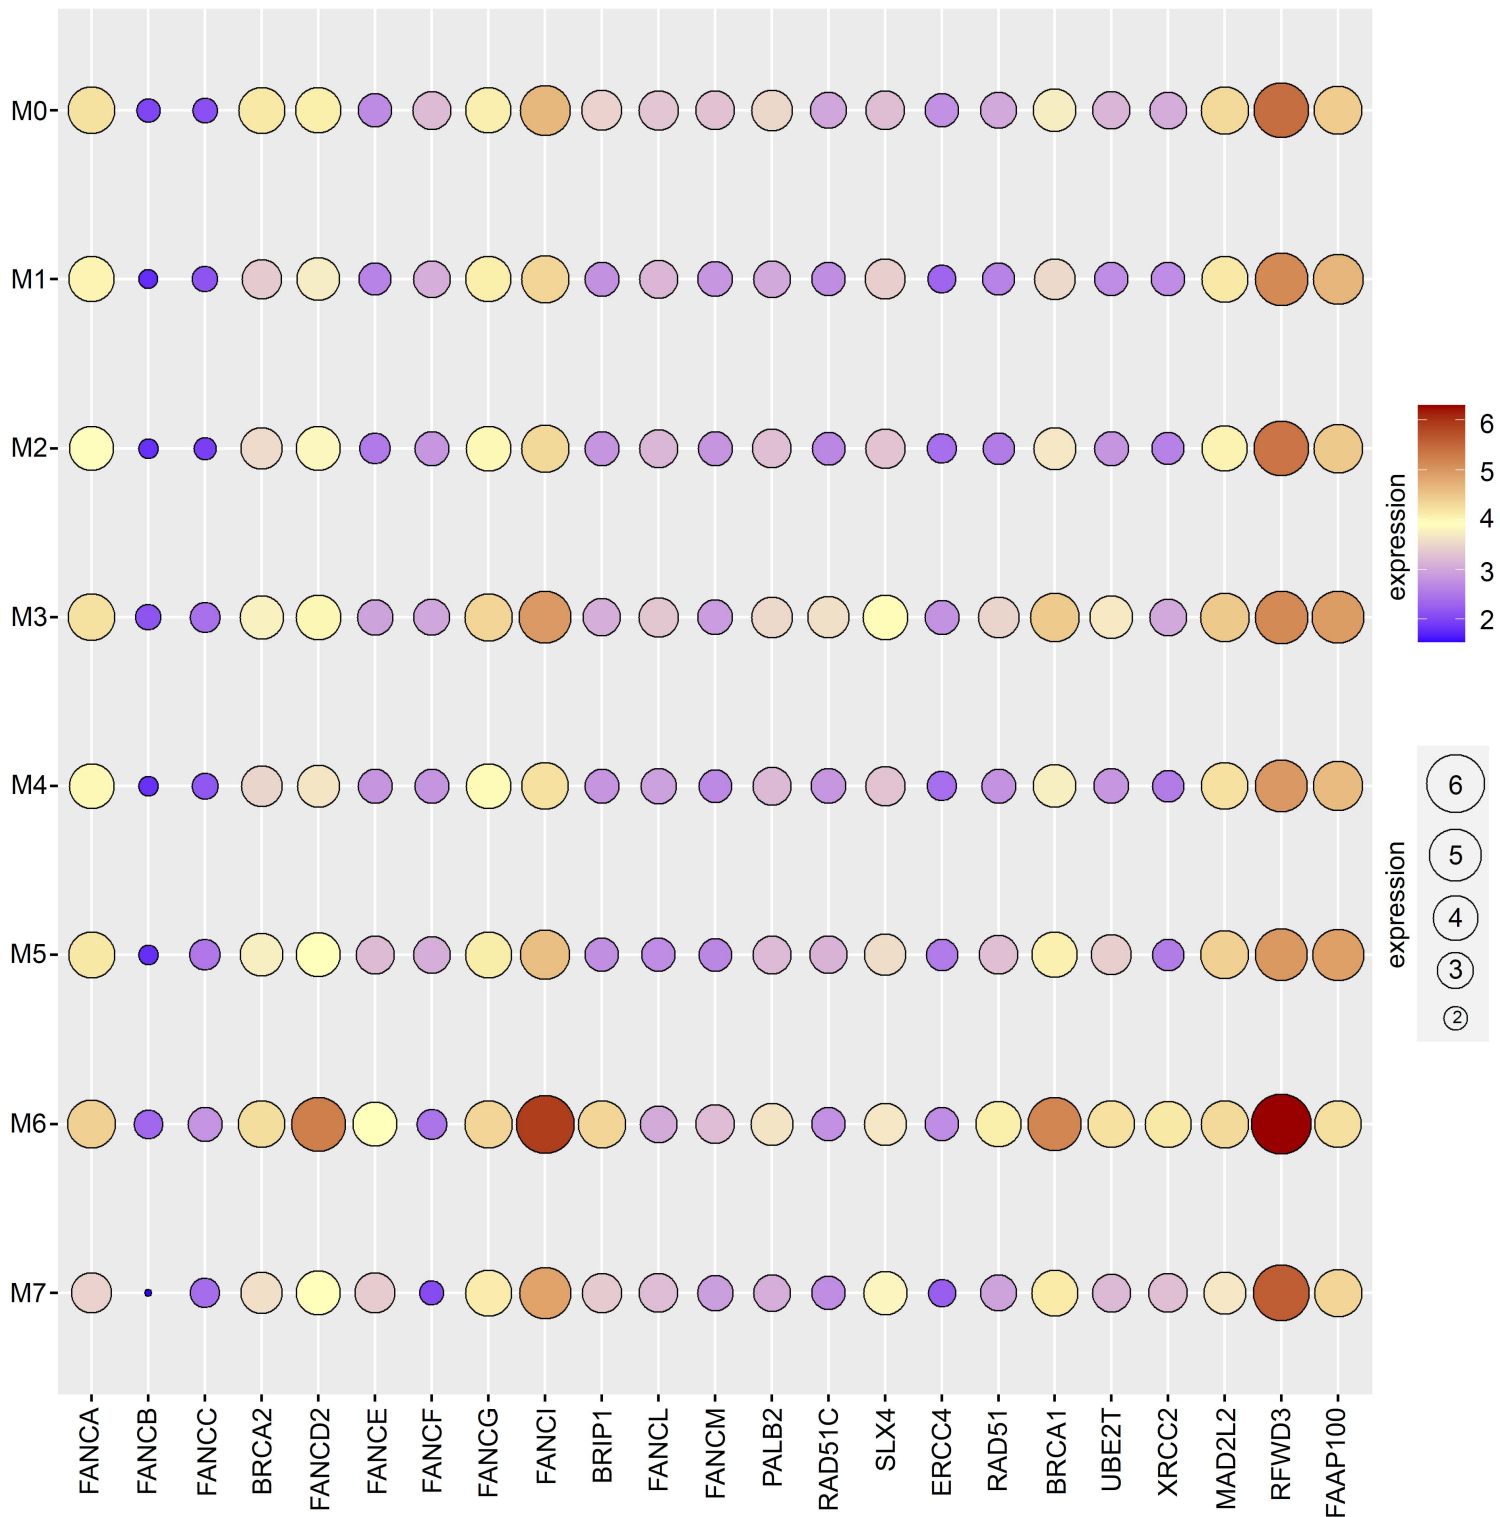

**Figure S3**

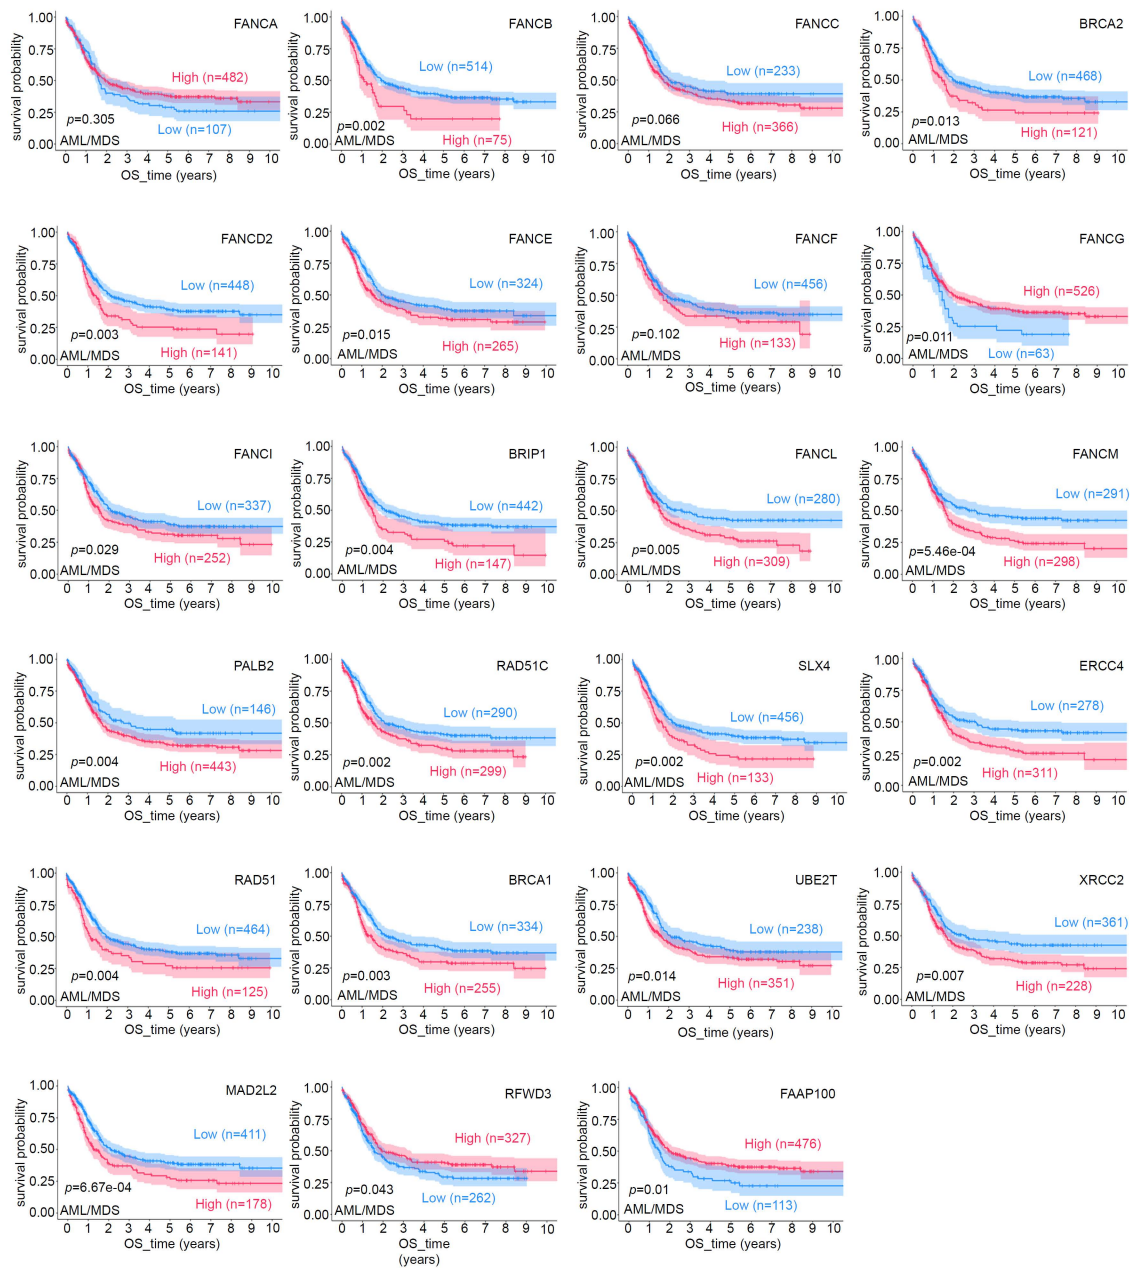

Figure S4

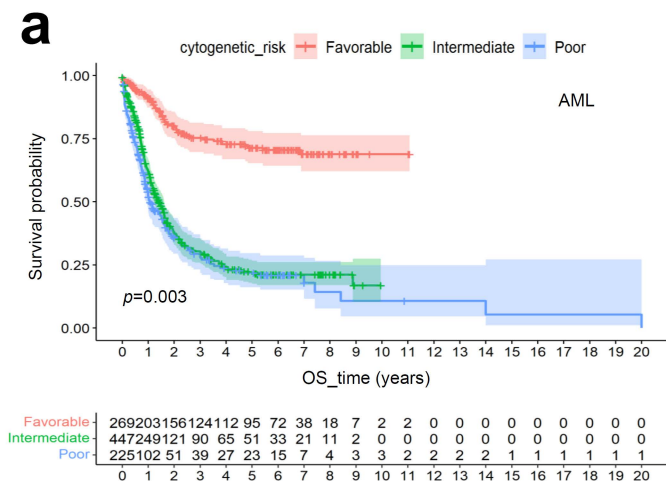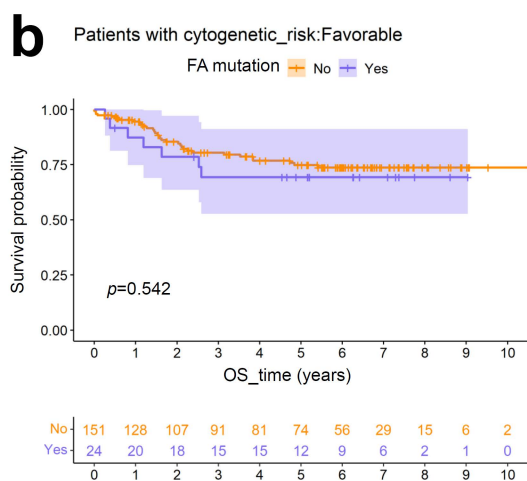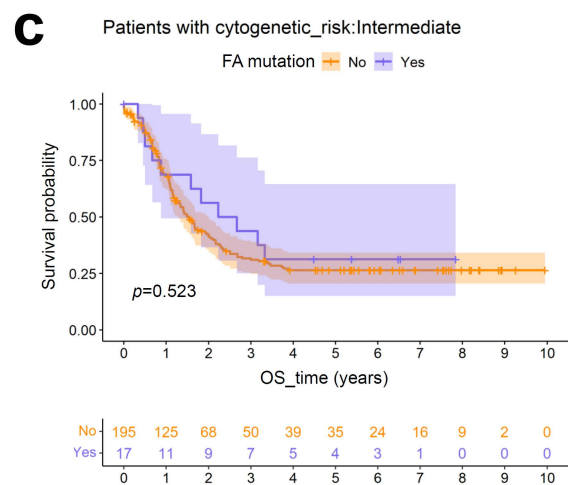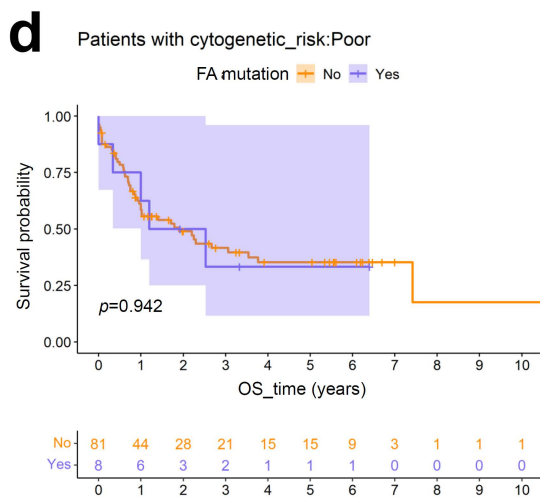

**Figure S5**

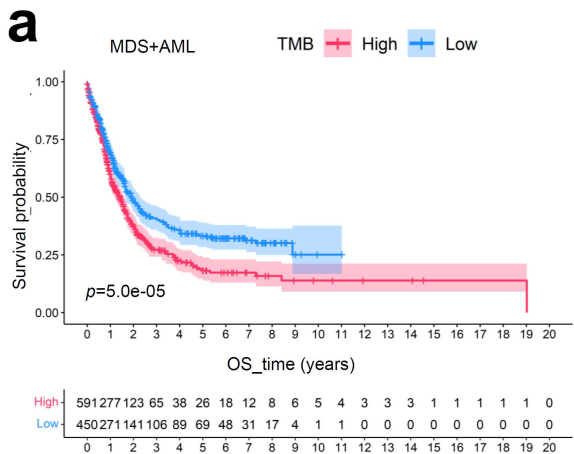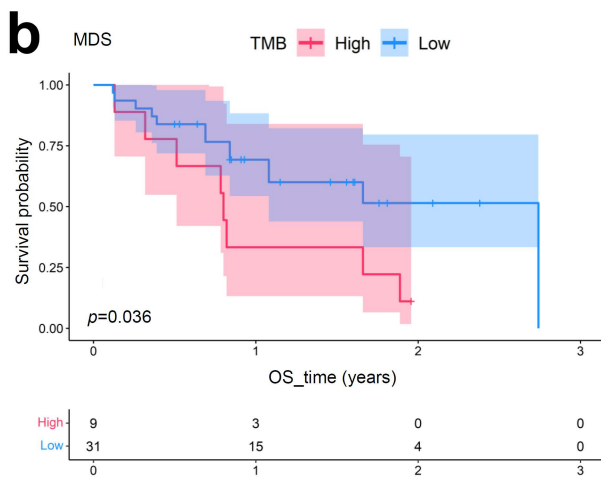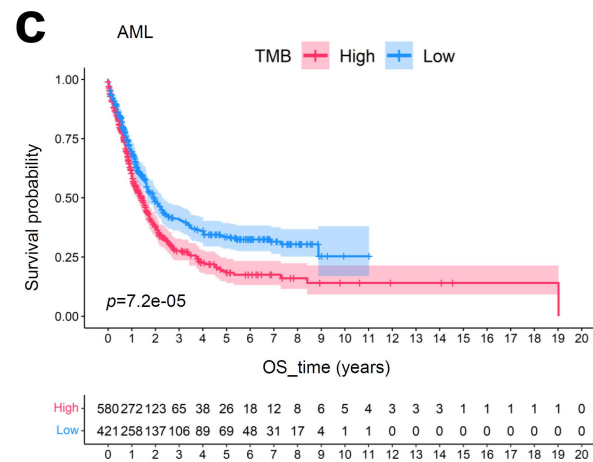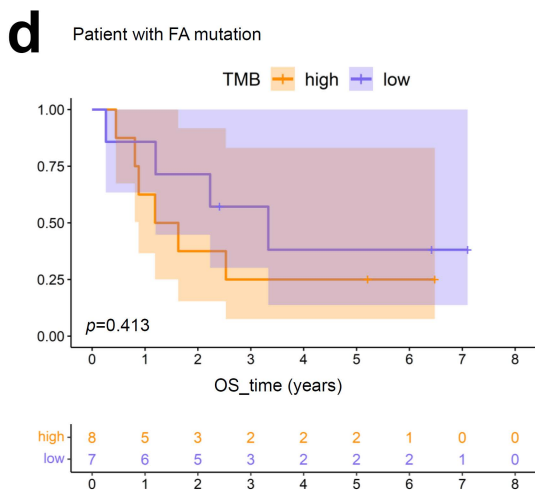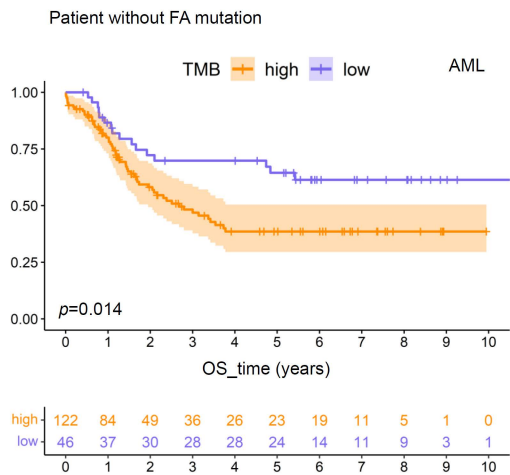

**Figure S6**

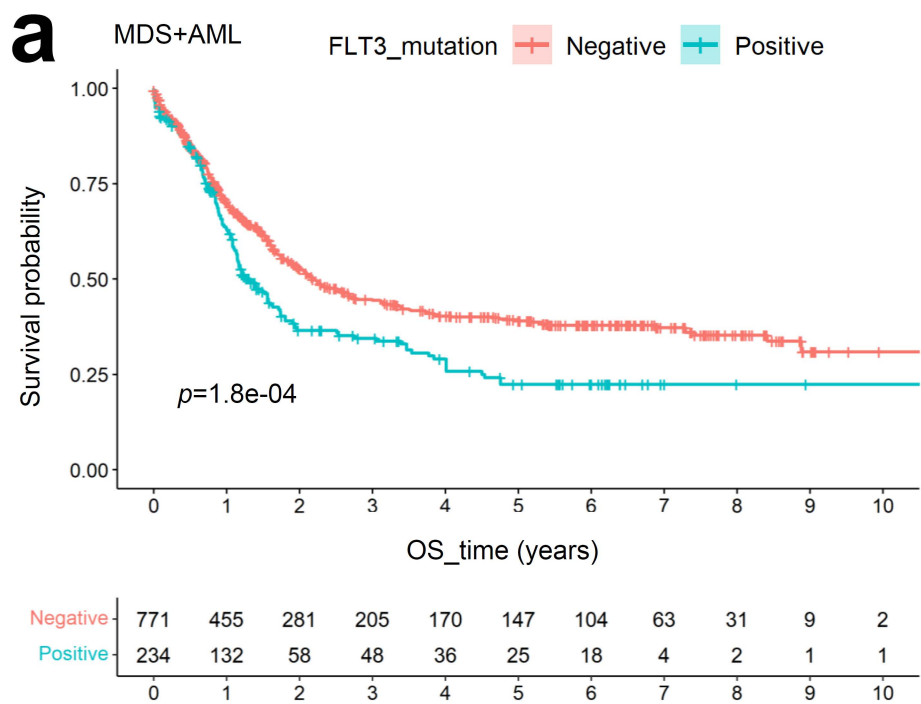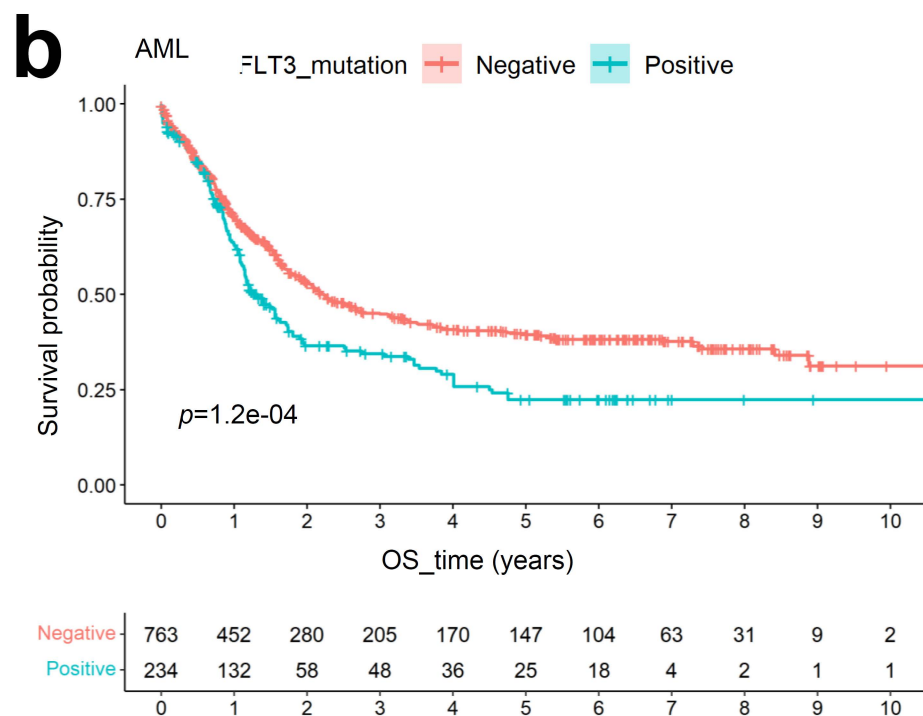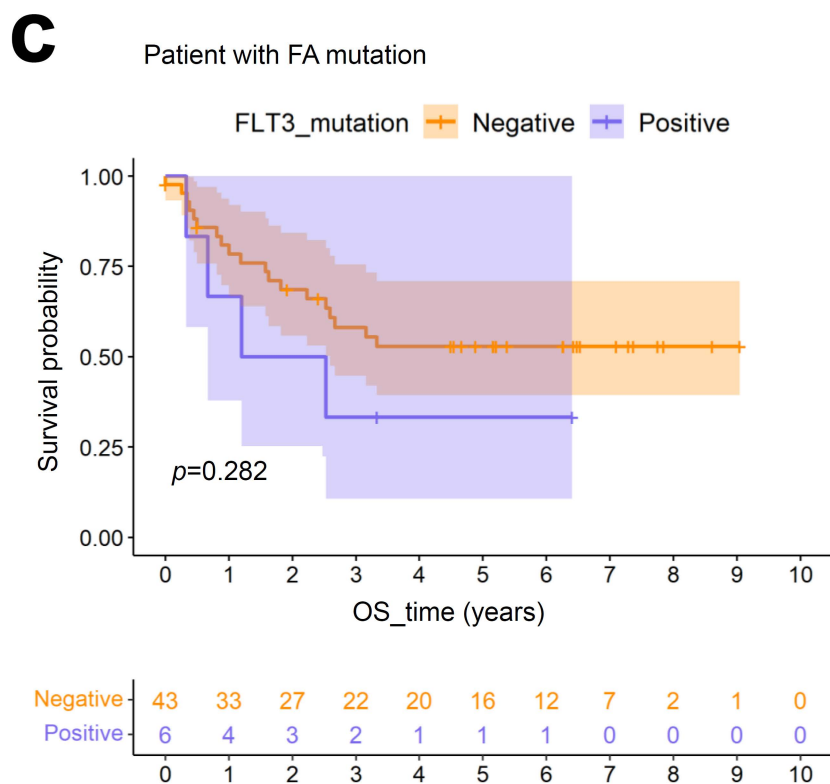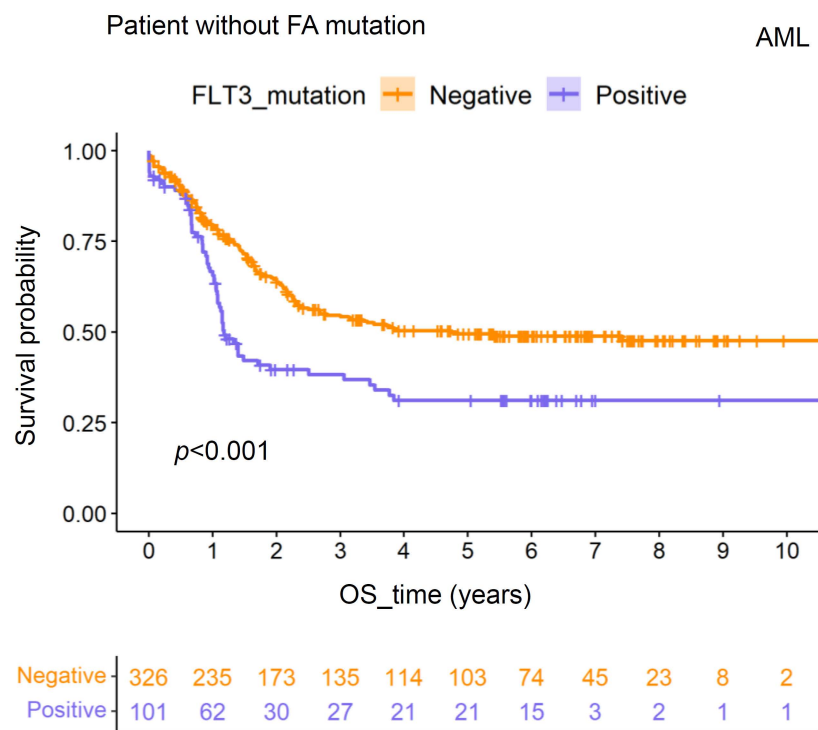

**Figure S7**

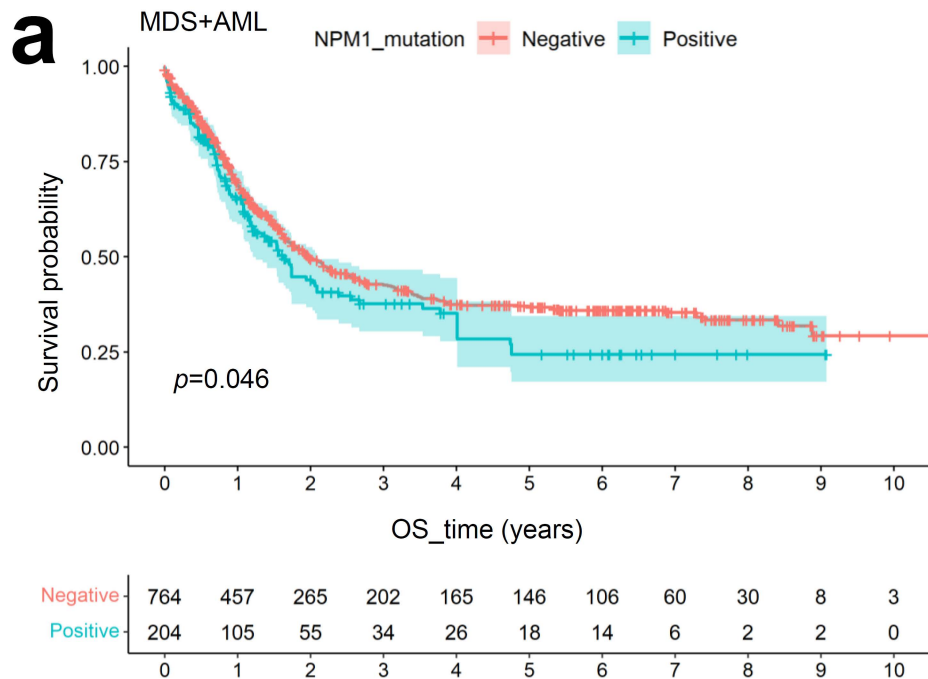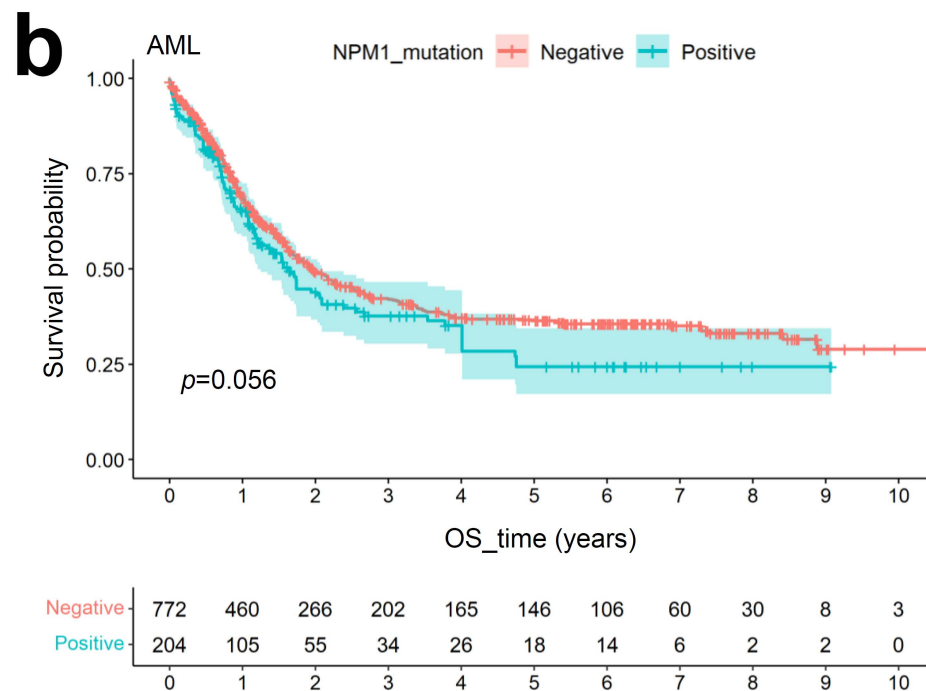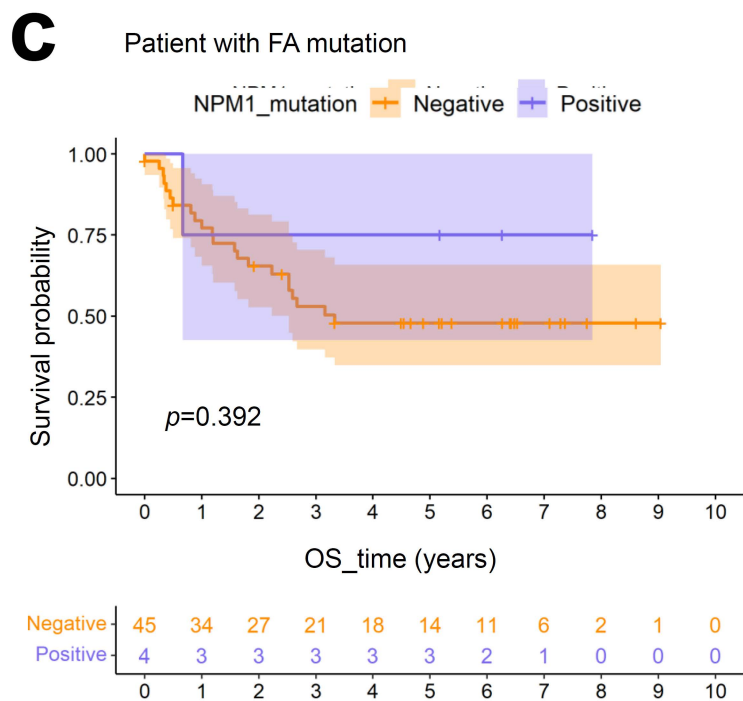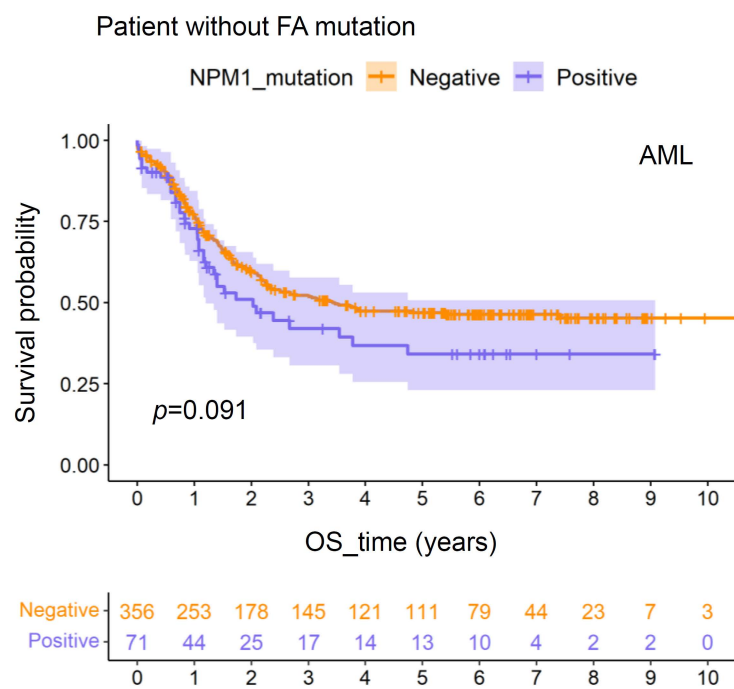

**Figure S8**
